# Supplementary material for: Genetic Diversity of Porcine Circovirus 2 in Wild Boar and Domestic Pigs in Ukraine
Source: MDPI journal article supplement (doi:10.3390/v14050924), 2022-04-28
Supplement: s1 [file s1]

**Supplemental Table S2.** Percent of reads in each sample from the major and minor variant.

| <b>Sample*</b> | <b>% of reads<br/>from major<br/>variant</b> | <b>%of reads from<br/>minor variant</b> | <b>% of reads<br/>mapped to major<br/>and minor variant</b> |
|----------------|----------------------------------------------|-----------------------------------------|-------------------------------------------------------------|
| Chernihiv 1    | 99.96                                        | NA                                      | 99.96                                                       |
| Chernihiv 2    | 99.99                                        | NA                                      | 99.99                                                       |
| Chernihiv 3    | 99.99                                        | NA                                      | 99.99                                                       |
| Chernihiv 4    | 100                                          | NA                                      | 100                                                         |
| Chernivtsi 1   | 96.49                                        | 3.47                                    | 99.96                                                       |
| Chernivtsi 2   | 96.03                                        | 3.93                                    | 99.96                                                       |
| Luhansk 2      | 100                                          | NA                                      | 100                                                         |
| Poltava 1      | 99.98                                        | NA                                      | 99.98                                                       |
| Poltava 2      | 100                                          | NA                                      | 100                                                         |
| Volyn          | 99.99                                        | NA                                      | 99.99                                                       |
| Zaporizhzhia   | 99.98                                        | NA                                      | 99.98                                                       |
| Kharkiv 1      | 99.99                                        | NA                                      | 99.99                                                       |
| Kharkiv 2      | 99.89                                        | NA                                      | 99.89                                                       |
| Kharkiv 3      | 99.99                                        | NA                                      | 99.99                                                       |
| Kharkiv 4      | 70.62                                        | 28.40                                   | 99.02                                                       |
| Kharkiv 5      | 93.80                                        | 5.84                                    | 99.64                                                       |
| Kharkiv 6      | 73.90                                        | 25.81                                   | 99.71                                                       |
